# Supplementary material for: Multistep synergistic modified NaNbO3-based ceramics for high-performance electrostatic capacitors
Source: Royal Society of Chemistry journal article supplement (doi:10.1039/d4ta02246g), 2024-01-01
Supplement: d4ta02246g1.pdf [file d4ta02246g1.pdf]

## Supporting Information

### **Multistep synergistic modified NaNbO<sub>3</sub>-based ceramics for high-performance electrostatic capacitors.**

Ling Lv<sup>1</sup>, Zhongbin Pan<sup>1\*</sup>, Jiawen Hu<sup>1</sup>, Zhixin Zhou<sup>1</sup>, Huanhuan Li<sup>1</sup>, Xiqi Chen<sup>1</sup>, Jinjun Liu<sup>1\*</sup>, Peng Li<sup>2</sup>, and Jiwei Zhai<sup>3\*</sup>

<sup>1</sup>School of Materials Science and Chemical Engineering, Ningbo University, Ningbo, Zhejiang, 315211, China. E-mail: panzhongbin@163.com, liujinjun1@nbu.edu.cn

<sup>2</sup>School of Materials Science and Engineering, Liaocheng University, Liaocheng, Shandong, 252059, China.

<sup>3</sup>School of Materials Science & Engineering, Tongji University, 4800 Caoan Road, Shanghai 201804, China. E-mail: apzhai@tongji.edu.cn

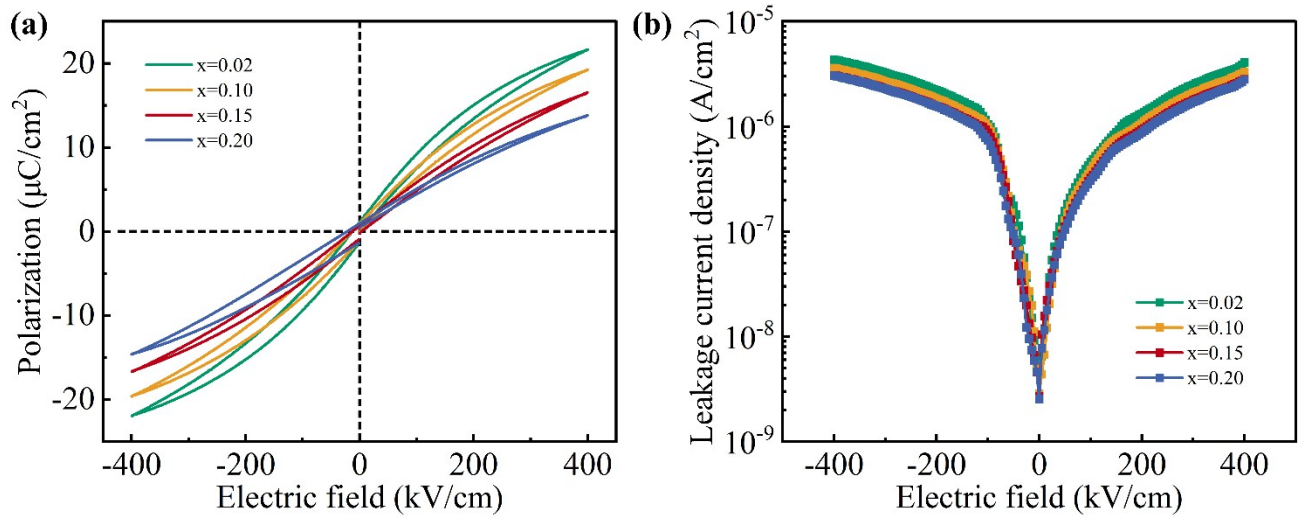

**Figure S1.** (a) Bipolar P-E loops of the NNCZ-xBH ceramic under 400 kV/cm electric field. (b) The leakage current density of NNCZ-xBH ceramics.

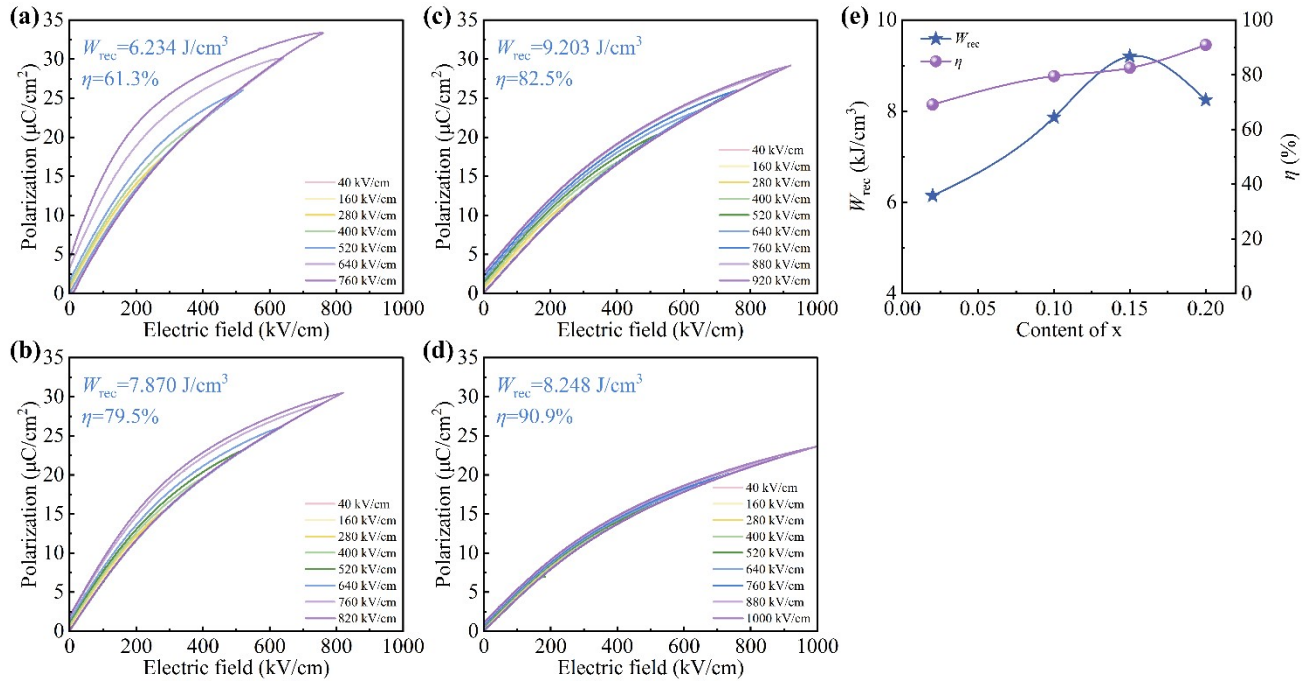

**Figure S2.** The unipolar  $P$ - $E$  loops for NNCZ-xBH ceramics with the as electric field increases. (a)  $x = 0.02$ . (b)  $x = 0.10$ . (c)  $x = 0.15$ . (d)  $x = 0.20$ . (e) The calculated  $W_{\text{rec}}$  and  $\eta$  for NNCZ-xBH ceramics.

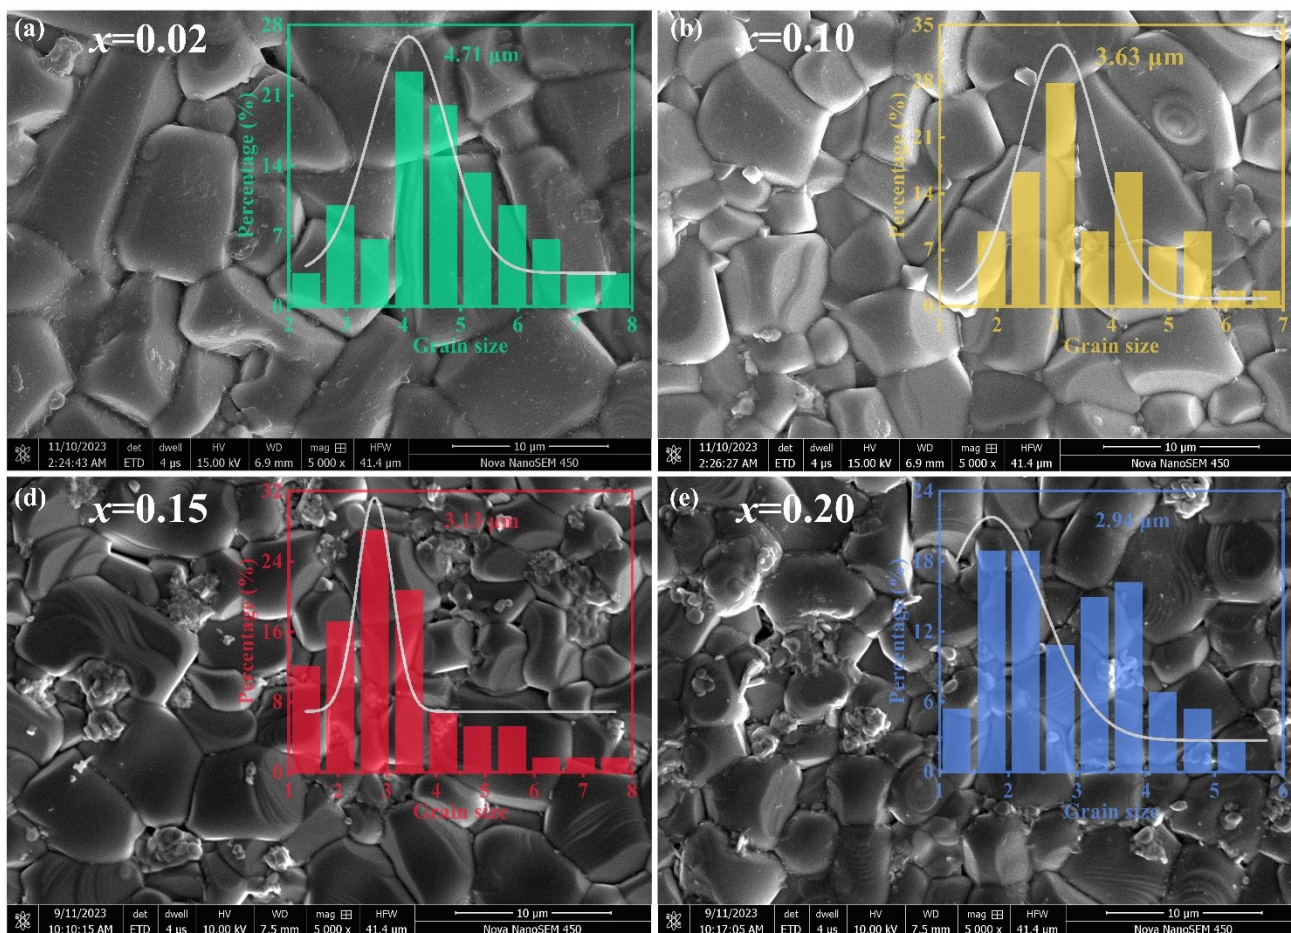

**Figure S3.** SEM micrographs on the thermally etched fractured surface of NNCZ-xBH ceramics. (a)  $x = 0.02$ . (b)  $x = 0.10$ . (c)  $x = 0.15$ . (d)  $x = 0.20$ . The inset of each figure corresponds to the statistical analysis of grain size distribution.

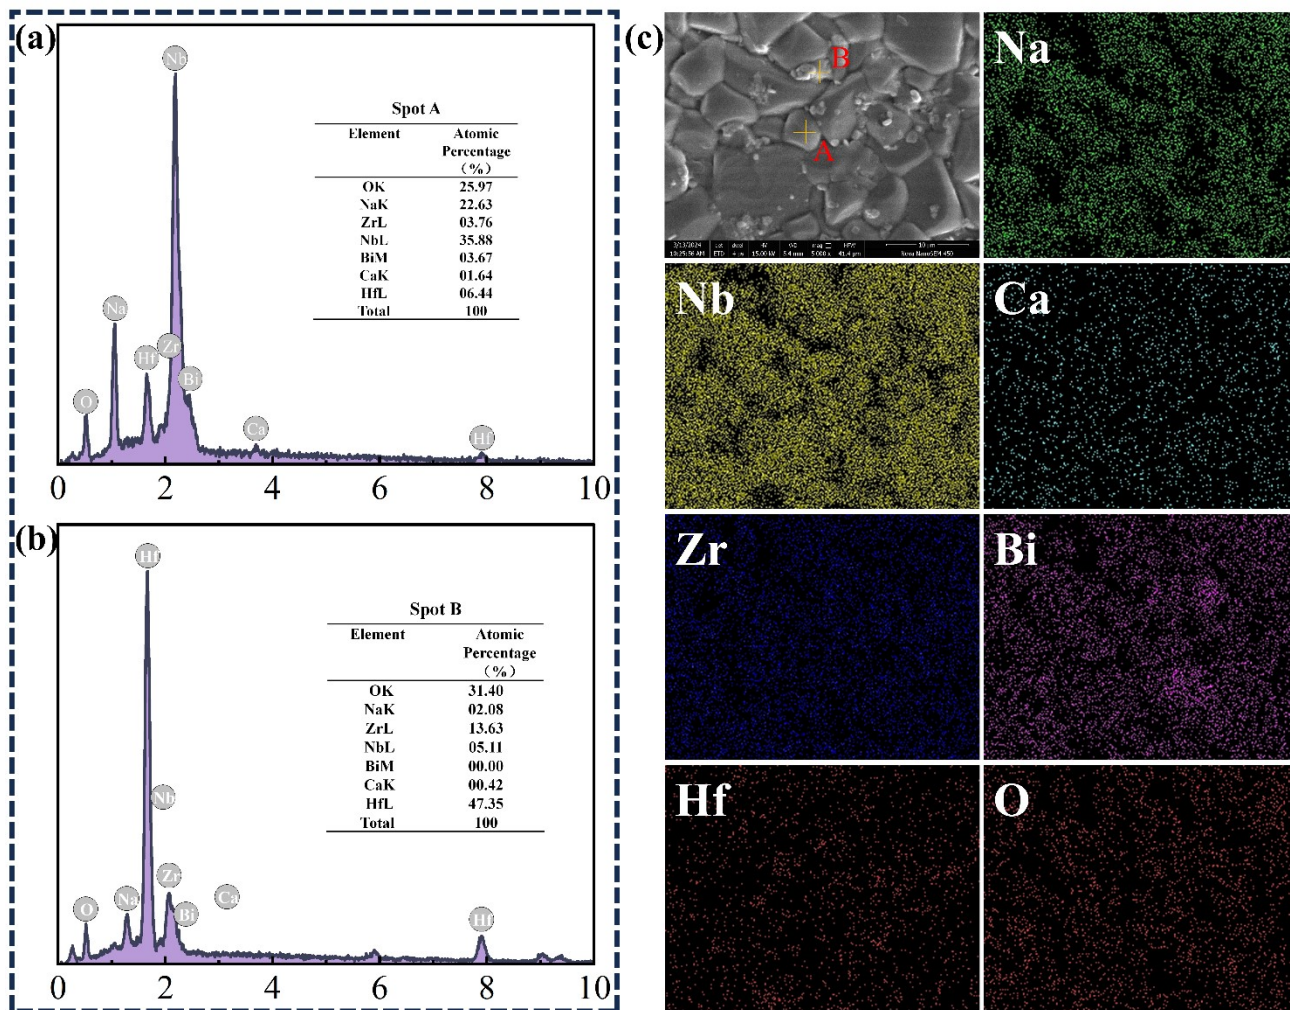

**Figure S4.** Energy spectrum and elemental distributions for the NNCZ–0.15BH ceramics.

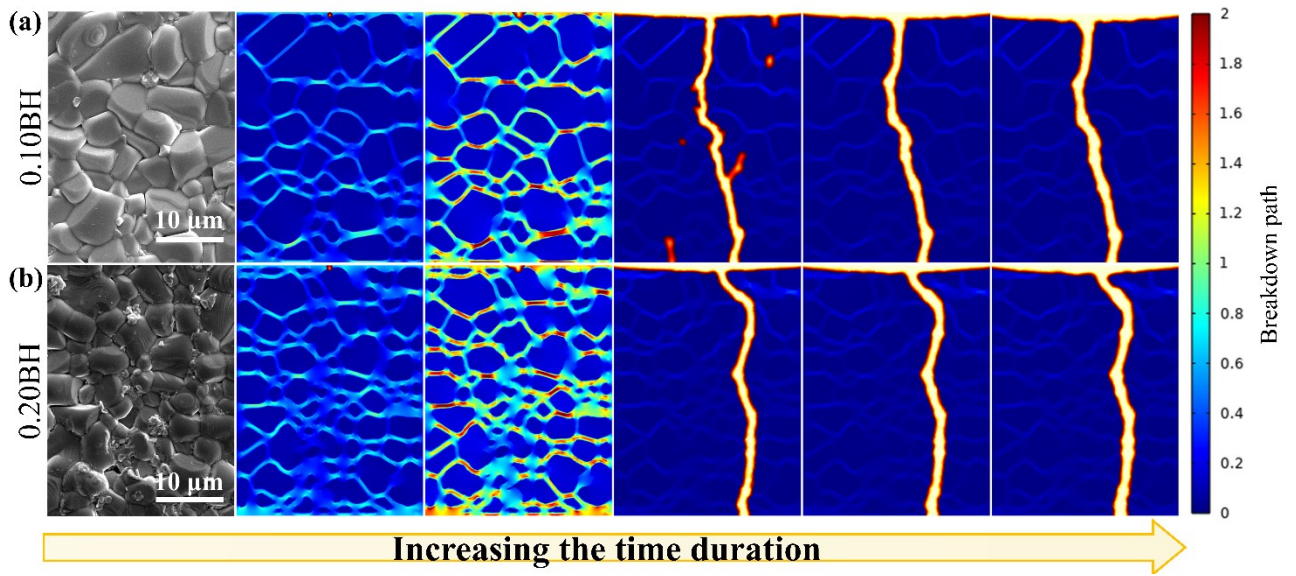

**Figure S5.** Phase field simulation of the breakdown path of (a) NNCZ-0.10BH ceramic and (b) NNCZ-0.20BH ceramic under the critical electric field.
